# Supplementary material for: Advanced Guareschi–Thorpe synthesis of pyridines in green buffer, and pH-controlled aqueous medium with ammonium carbonate
Source: Royal Society of Chemistry journal article supplement (doi:10.1039/d3ra04590k), 2023-01-01
Supplement: d3ra04590k1.pdf [file d3ra04590k1.pdf]

## Supporting Information

### Advanced and green Guareschi-Thorpe synthesis of pyridines at bufferic pH-controlled aqueous medium with ammonium carbonate

Fatemeh Tamaddon<sup>a</sup>, Sajedeh Maddah-Roodan

<sup>a</sup> Department of Chemistry, Yazd University, Yazd 89195-741, Iran

Ph.D. student in organic chemistry, Department of Chemistry, Yazd University, Yazd 89195-741, Iran

E-mail: ftamaddon@yazd.ac.ir or sajedeh.maddah@stu.yazd.ac.ir

#### List of contents

|                                                                                                       |           |
|-------------------------------------------------------------------------------------------------------|-----------|
| Preparation of cyanopyridines with ethyl cyanoacetate and $\beta$ -ketoesters or 1,3-diketones: ..... | S3        |
| Preparation of cyanopyridines with cyanoacetamide and $\beta$ -ketoesters or 1,3-diketones: .....     | S3        |
| Scope of cyanopyridines.....                                                                          | S4        |
| <b>Analytical and spectra data for selected products.....</b>                                         | <b>S4</b> |
| FT-IR (KBr) spectrum of ( <b>1a</b> ).....                                                            | S6        |
| <sup>1</sup> H NMR (500 MHz, DMSO- <i>d</i> <sub>6</sub> ) spectrum of ( <b>1a</b> ) .....            | S7        |
| Expand of <sup>1</sup> H NMR (500 MHz, DMSO- <i>d</i> <sub>6</sub> ) spectrum of ( <b>1a</b> ) .....  | S7        |
| <sup>13</sup> C NMR (125 MHz, DMSO- <i>d</i> <sub>6</sub> ) spectrum of ( <b>1a</b> ).....            | S8        |
| FT-IR (KBr) spectrum of ( <b>1c</b> ) .....                                                           | S9        |
| FT-IR (KBr) spectrum of ( <b>1e</b> ) .....                                                           | S10       |
| <sup>1</sup> H NMR (500 MHz, DMSO- <i>d</i> <sub>6</sub> ) spectrum of ( <b>1e</b> ) .....            | S11       |
| Expand of <sup>1</sup> H NMR (500 MHz, DMSO- <i>d</i> <sub>6</sub> ) spectrum of ( <b>1e</b> ).....   | S11       |
| <sup>13</sup> C NMR (125 MHz, DMSO- <i>d</i> <sub>6</sub> ) spectrum of ( <b>1e</b> ).....            | S12       |
| FT-IR (KBr) spectrum of ( <b>1f</b> ).....                                                            | S13       |
| <sup>1</sup> H NMR (500 MHz, DMSO- <i>d</i> <sub>6</sub> ) spectrum of ( <b>1f</b> ).....             | S14       |
| <sup>13</sup> C NMR (125 MHz, DMSO- <i>d</i> <sub>6</sub> ) spectrum of ( <b>1f</b> ).....            | S15       |
| FT-IR (KBr) spectrum of ( <b>1g</b> ).....                                                            | S16       |
| <sup>1</sup> H NMR (500 MHz, DMSO- <i>d</i> <sub>6</sub> ) spectrum of ( <b>1g</b> ).....             | S17       |
| Expand of <sup>1</sup> H NMR (500 MHz, DMSO- <i>d</i> <sub>6</sub> ) spectrum of ( <b>1g</b> ) .....  | S17       |

|                                                                                                     |     |
|-----------------------------------------------------------------------------------------------------|-----|
| FT-IR (KBr) spectrum of <b>(1h)</b> .....                                                           | S18 |
| <sup>1</sup> H NMR (500 MHz, DMSO- <i>d</i> <sub>6</sub> ) spectrum of <b>(1h)</b> .....            | S19 |
| FT-IR (KBr) spectrum of <b>(1i)</b> .....                                                           | S20 |
| <sup>1</sup> H NMR (500 MHz, DMSO- <i>d</i> <sub>6</sub> ) spectrum of <b>(1i)</b> .....            | S21 |
| Expand of <sup>1</sup> H NMR (500 MHz, DMSO- <i>d</i> <sub>6</sub> ) spectrum of <b>(1i)</b> .....  | S21 |
| <sup>13</sup> C NMR (125 MHz, DMSO- <i>d</i> <sub>6</sub> ) spectrum of <b>(1i)</b> .....           | S22 |
| FT-IR (KBr) spectrum of <b>(2a)</b> .....                                                           | S23 |
| FT-IR (KBr) spectrum of <b>(2b)</b> .....                                                           | S24 |
| <sup>1</sup> H NMR (500 MHz, DMSO- <i>d</i> <sub>6</sub> ) spectrum of <b>(2b)</b> .....            | S25 |
| Expand of <sup>1</sup> H NMR (500 MHz, DMSO- <i>d</i> <sub>6</sub> ) spectrum of <b>(2b)</b> .....  | S25 |
| <sup>13</sup> C NMR (125 MHz, DMSO- <i>d</i> <sub>6</sub> ) spectrum of <b>(2b)</b> .....           | S26 |
| Expand of <sup>13</sup> C NMR (125 MHz, DMSO- <i>d</i> <sub>6</sub> ) spectrum of <b>(2b)</b> ..... | S26 |

### Preparation of cyanopyridines with ethyl cyanoacetate and $\beta$ -ketoesters or 1,3-diketones:

A mixture of  $\beta$ -ketoester or 1,3-diketone (1 mmol), ethyl cyanoacetate (1 mmol, 0.11 mL) and  $(\text{NH}_4)_2\text{CO}_3$  (2 mmol, 0.192 g) in  $\text{H}_2\text{O}$  and EtOH (1:1, v/v) was stirred vigorously at 80 °C for 5-8 h in a round-bottom flask. The progress of the reaction was monitored *via* TLC (EtOAc: Hexane) (30:70) analysis. After the reaction finishing, the precipitated product by adding ice cold water (20 mL) to the reaction mixture was filtered, washed, and dried..

### Preparation of cyanopyridines with cyanoacetamide and $\beta$ -ketoesters or 1,3-diketones:

A solution containing cyanoacetamide (1 mmol), ethyl cyanoacetate (1 mmol, 0.11 mL) and  $(\text{NH}_4)_2\text{CO}_3$  (1 mmol, 0.096 g) in 2 mL of  $\text{H}_2\text{O}$  and EtOH (1:1) was stirred at 80 °C for 1-6 h. After completion of the reaction, the resulting solid was collected like the previous method.

### Scope of cyanopyridines:

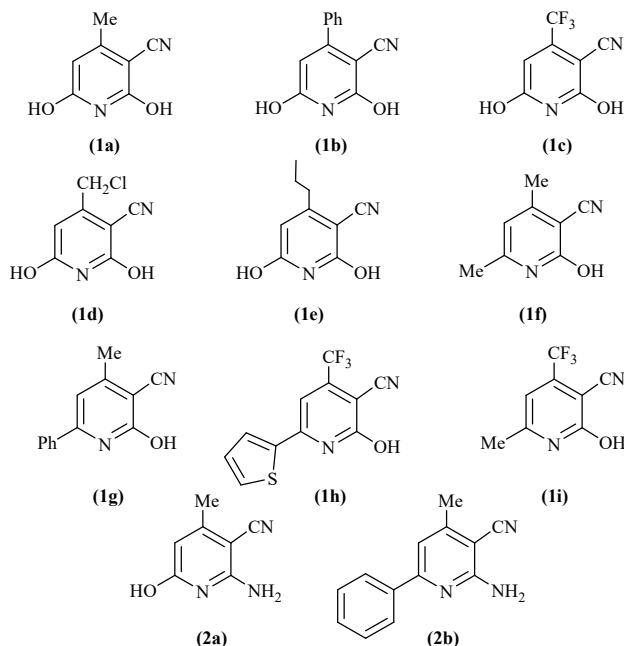

### Analytical and spectra data for selected products:

#### 2,6-Dihydroxy-4-methylpyridine-3-carbonitrile (**1a**)

white solid, m.p.: 323-328, FT-IR (KBr):  $\bar{\nu}_{\max}$  3150-2900 (OH stretching), 2223 (C≡N), 1598 (C=N)  $\text{cm}^{-1}$ .  $^1\text{H}$  NMR (500 MHz, DMSO- $d_6$ ):  $\delta_{\text{H}}$  2.22 (s, 3H, CH<sub>3</sub>), 5.59 (s, 1H, CH ring), 12.00 (br s, 2H, OH) ppm.  $^{13}\text{C}$  NMR (125 MHz, DMSO- $d_6$ ):  $\delta_{\text{C}}$  21.5, 90.1, 93.5, 117.9, 161.2, 161.8, 162.7 ppm.

#### 4-(Trifluoromethyl)-2,6-dihydroxypyridine-3-carbonitrile (**1c**)

white solid, m.p.: 225-230 °C, FT-IR (KBr):  $\bar{\nu}_{\max}$  3391-2934 (OH stretching), 2226 (C≡N), 1618 (C=N ring)  $\text{cm}^{-1}$ .

#### 2,6-Dihydroxy-4-propylpyridine-3-carbonitrile (**1e**)

white solid, m.p.: 295-300 °C, FT-IR (KBr):  $\bar{\nu}_{\max}$  3200-2800 (OH stretching), 2223 (C≡N), 1599 (C=N ring)  $\text{cm}^{-1}$ .  $^1\text{H}$  NMR (500 MHz, DMSO- $d_6$ ):  $\delta_{\text{H}}$  0.92 (t,  $J=7$  Hz, 3H, CH<sub>3</sub>), 1.57 (m,  $J=7.5$  Hz, 2H, CH<sub>2</sub>CH<sub>3</sub>), 2.49 (t,  $J=7.5$  Hz, 2H, CH<sub>2</sub>CH<sub>2</sub>), 4.90 (br s, 2H, OH) 5.58 (s, 1H, CH ring) ppm.  $^{13}\text{C}$  NMR (125 MHz, DMSO- $d_6$ ):  $\delta_{\text{C}}$  14.2, 14.6, 21.8, 32.2, 46.5, 59.9, 61.2, 80.0, 109.9, 111.4, 111.5, 115.0, 145.2, 149.5, 165.9, 168.9 ppm.

#### 2-Hydroxy-4,6-dimethylpyridine-3-carbonitrile (**1f**)

white solid, m.p.: 367-370 °C, FT-IR (KBr):  $\bar{\nu}_{\max}$  3100-2800 (OH stretching), 2218 (C≡N), 1618 (C=N ring)  $\text{cm}^{-1}$ .  $^1\text{H}$  NMR (500 MHz, DMSO- $d_6$ ):  $\delta_{\text{H}}$  2.21 (s, 3H, CH<sub>3</sub>), 2.33 (s, 3H, CH<sub>3</sub>), 6.13 (s, 1H, CH ring), 12.24 (s, 1H, OH) ppm.  $^{13}\text{C}$  NMR (125 MHz, DMSO- $d_6$ ):  $\delta_{\text{C}}$  19.7, 21.5, 99.9, 108.3, 116.6, 152.1, 161.3, 161.4 ppm.

#### 2-Hydroxy-4-methyl-6-phenylpyridine-3-carbonitrile (**1g**)

white solid, m.p.: 290-296, FT-IR (KBr):  $\bar{\nu}_{\max}$  3100-3000 (OH stretching), 2222 (C≡N), 1608 (C=N ring)  $\text{cm}^{-1}$ .  $^1\text{H}$  NMR (500 MHz, DMSO- $d_6$ ):  $\delta_{\text{H}}$  2 (s, 3H, <sub>3</sub>), 5.70 (s, 1H), 7.83 (d,  $J=7$  Hz, 2H), 7.41-7.45 (m,  $J=7$  Hz, 3H), 10.03 (s, 1H, OH) ppm.

#### 4-(Trifluoromethyl)-2-hydroxy-6-(thiophen-2-yl) pyridine-3-carbonitrile (**1h**)

yellow solid, m.p.: 285 °C, FT-IR (KBr):  $\bar{\nu}_{\max}$  3102 (NH stretching), 2231 (C≡N), 1642 (C=O)  $\text{cm}^{-1}$ .  $^1\text{H}$  NMR (500 MHz, DMSO- $d_6$ ):  $\delta_{\text{H}}$  7.27 (t,  $J=4$  Hz, 1H, CH ring), 7.67 (s, 1H, CH ring), 7.91 (d,  $J=5$  Hz, 1H, CH ring), 8.19 (s, 1H, CH ring), 13-14 (br s, 1H, OH) ppm.

#### 4-(Trifluoromethyl)-2-hydroxy-6-methylpyridine-3-carbonitrile (**1i**)

white solid. M.p.: 232-236 °C, FT-IR (KBr):  $\bar{\nu}_{\max}$  3102 (NH stretching), 2231 (C≡N), 1641 (C=O)  $\text{cm}^{-1}$ .  $^1\text{H}$  NMR (500 MHz, DMSO- $d_6$ ):  $\delta_{\text{H}}$  2.38 (s, 3H, CH<sub>3</sub>), 6.61 (s, 1H, CH ring), 13.35 (s, 1H, OH) ppm.  $^{13}\text{C}$  NMR (125 MHz, DMSO- $d_6$ ):  $\delta_{\text{C}}$  19.5, 96.1, 101.5, 113.4, 121.9 (q,  $J=273.75$  Hz, CF<sub>3</sub>), 145.8 (q,  $J=32.5$  Hz, C-CF<sub>3</sub>), 156.9, 160.4 ppm.

#### 2-Amino-4-methyl-6-hydroxypyridine-3-carbonitrile (**2a**)

pale yellow solid, m.p.: 132-134 °C FT-IR (KBr):  $\bar{\nu}_{\max}$  3381, 3230, 3326 (NH stretching), 2215 (C≡N), 1723 (C=O), 1646 (C=N ring)  $\text{cm}^{-1}$ .

#### 2-Amino-4-methyl-6-phenylpyridine-3-carbonitrile (**2b**)

pale pink solid, m.p.: 185-189 °C FT-IR (KBr):  $\bar{\nu}_{\max}$  3469, 3344, 3239 (NH stretching), 2211 (C≡N), 1640 (C=N ring)  $\text{cm}^{-1}$ .  $^1\text{H}$  NMR (500 MHz, DMSO- $d_6$ ):  $\delta_{\text{H}}$  2.45 (s, 3H, CH<sub>3</sub>), 6.68 (s, 2H, NH), 6.75 (s, 1H, CH ring), 7.51-7.54 (m, 5H) ppm.  $^{13}\text{C}$  NMR (125 MHz, DMSO- $d_6$ ):  $\delta_{\text{C}}$  21.4, 115.9, 116.6, 119.5, 128.8, 129.1, 129.7, 148.7, 150.1, 153.9 ppm.

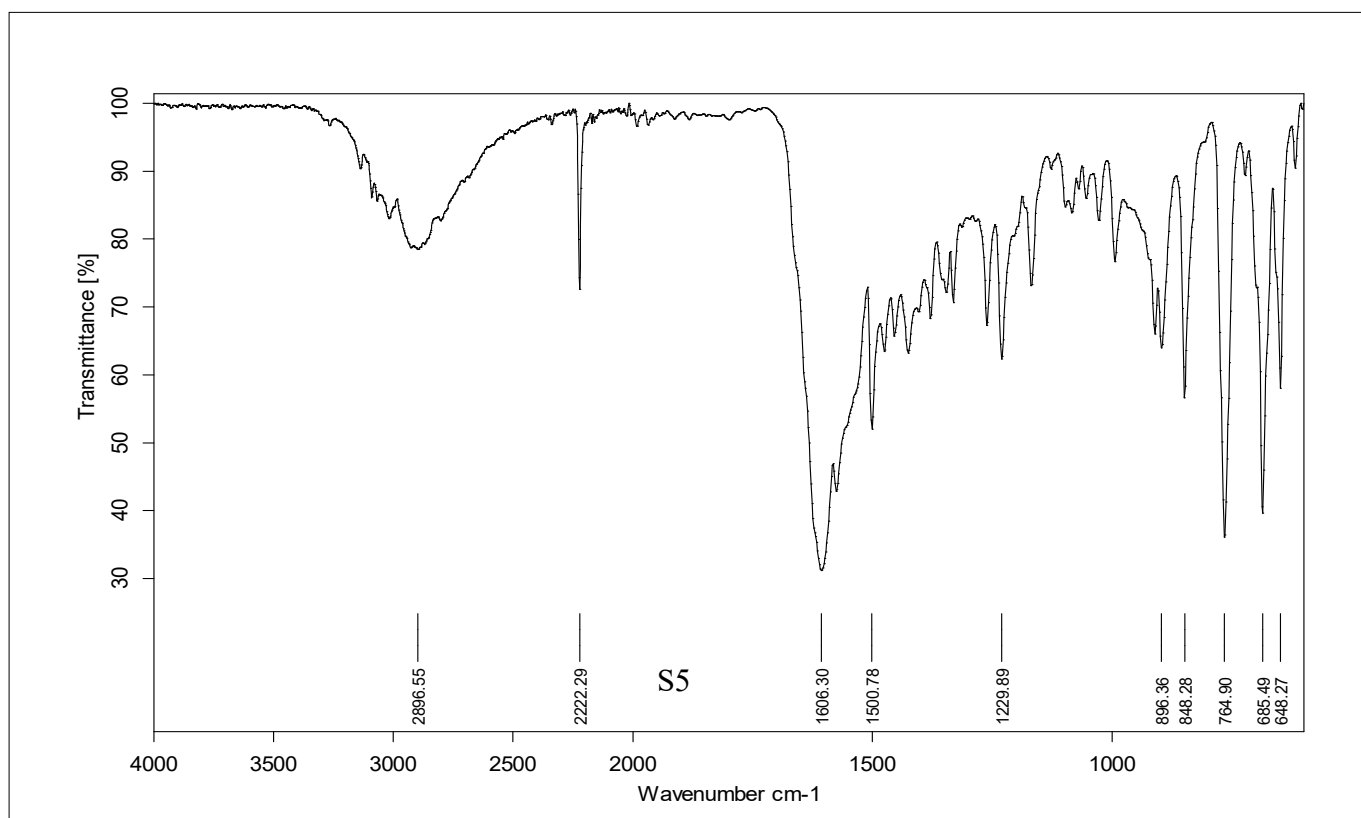

FT-IR (KBr) spectrum of (1a)

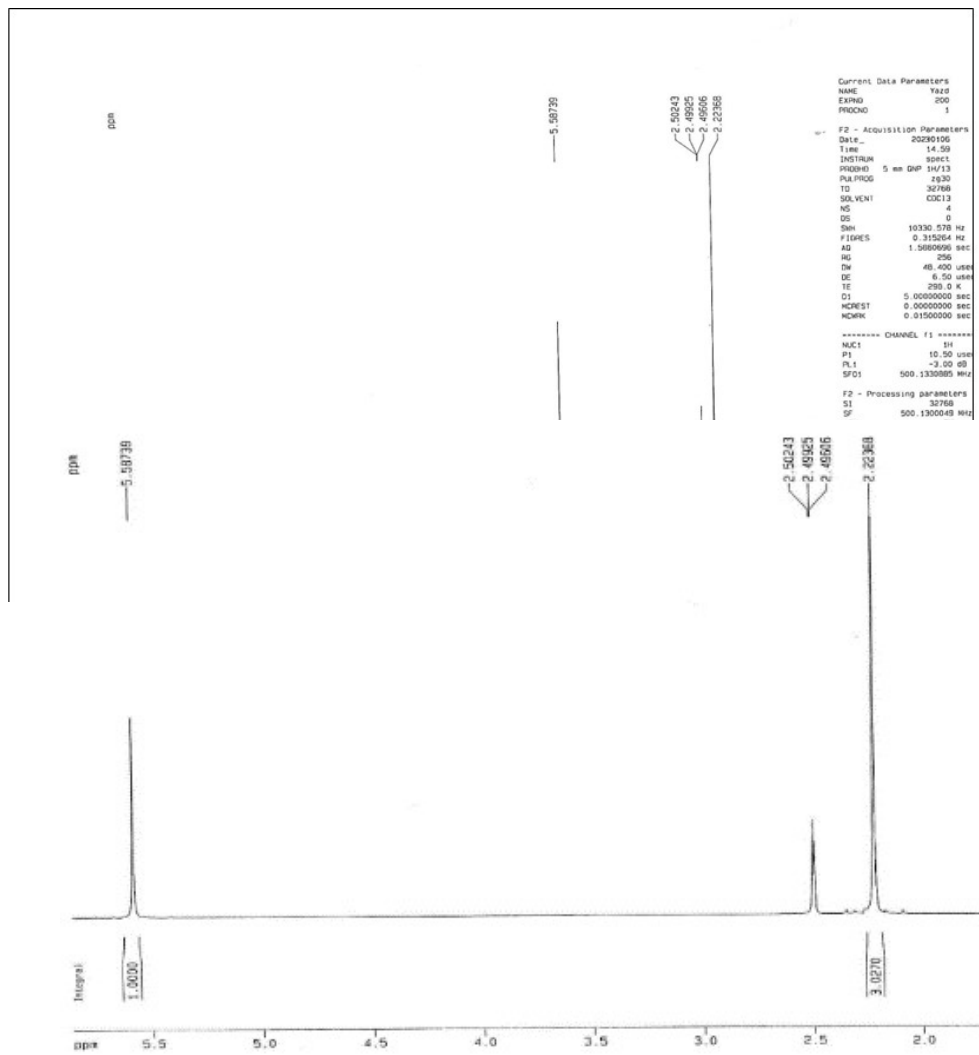

Expand of  $^1\text{H}$  NMR (500 MHz,  $\text{DMSO-}d_6$ ) spectrum of (**1a**)

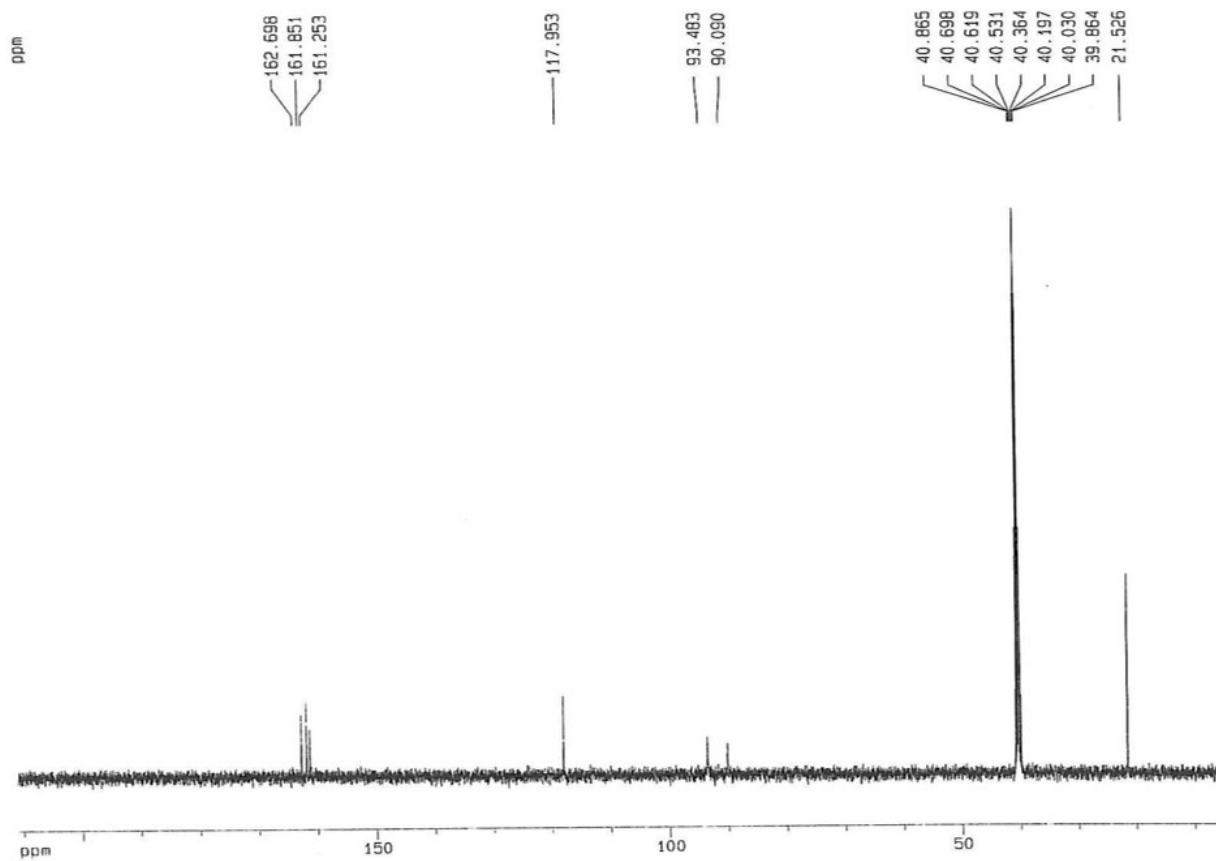

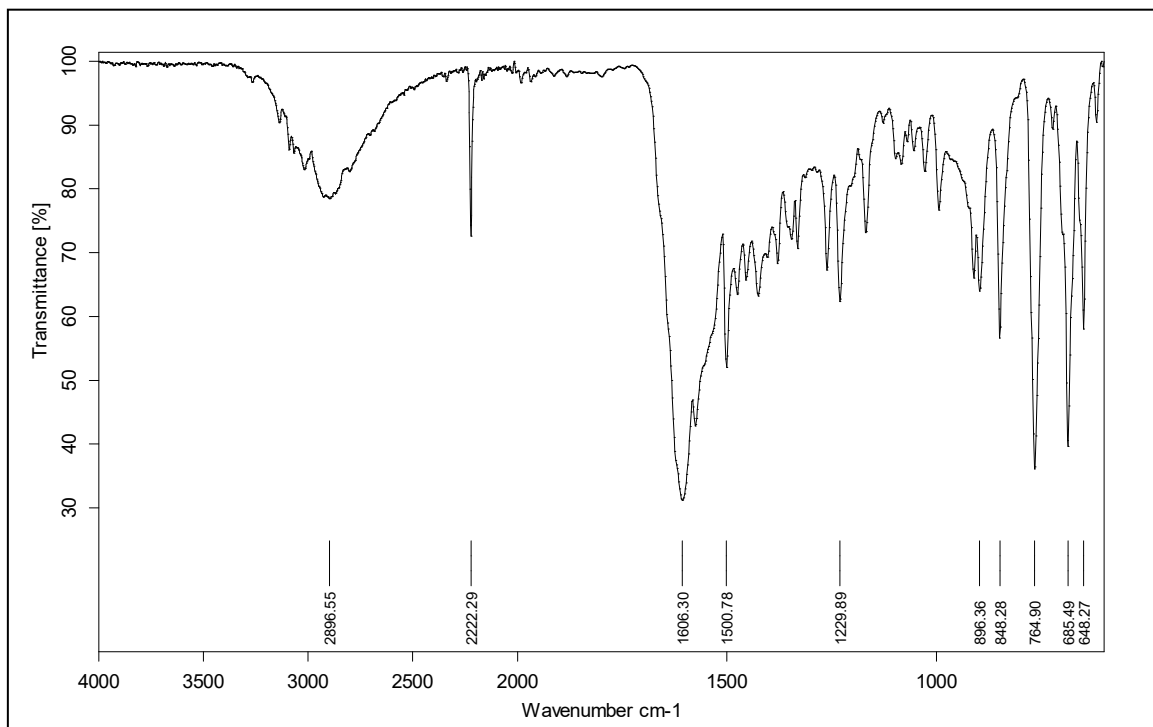

FT-IR (KBr) spectrum of (**1c**)



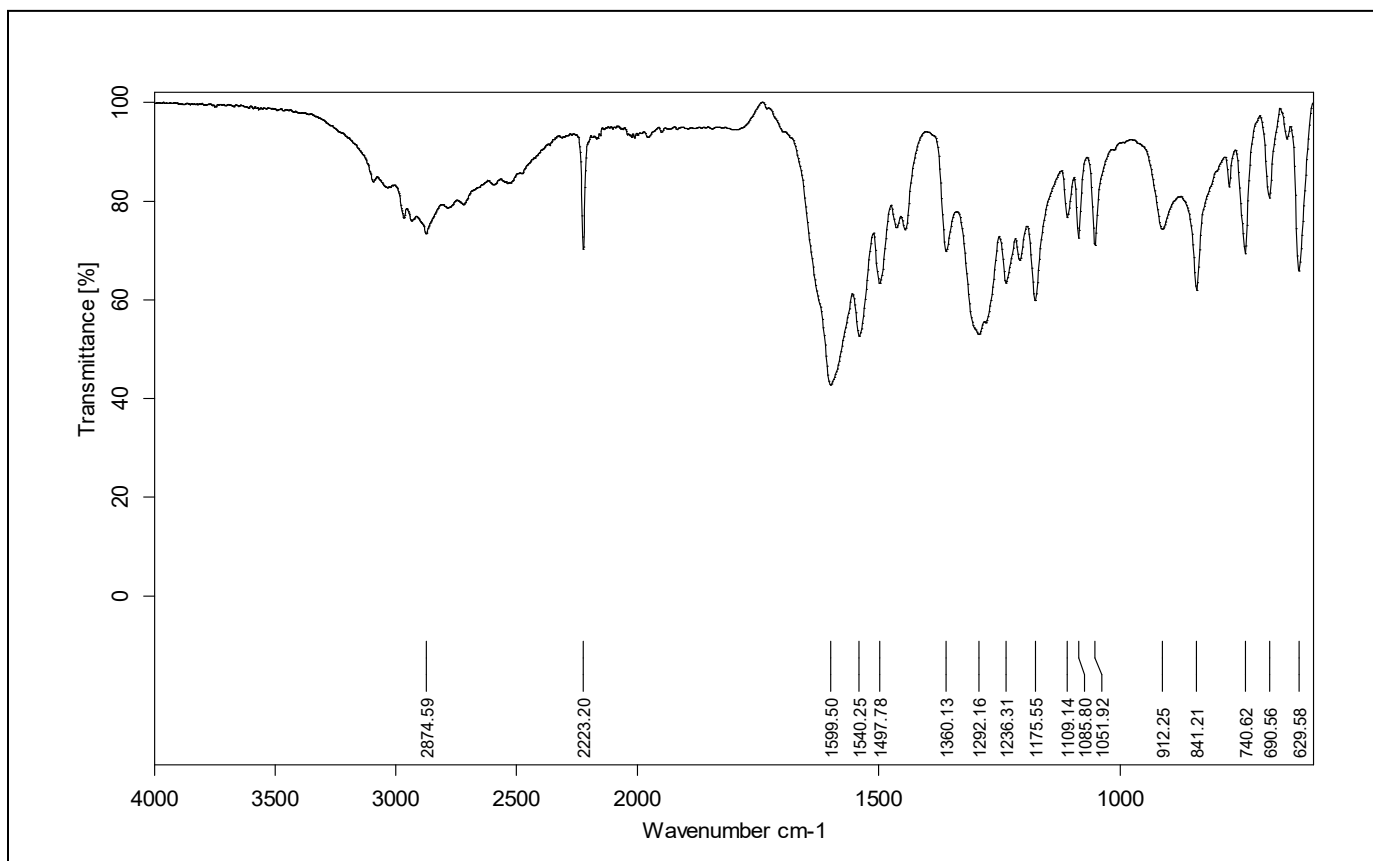

FT-IR (KBr) spectrum of **1e**

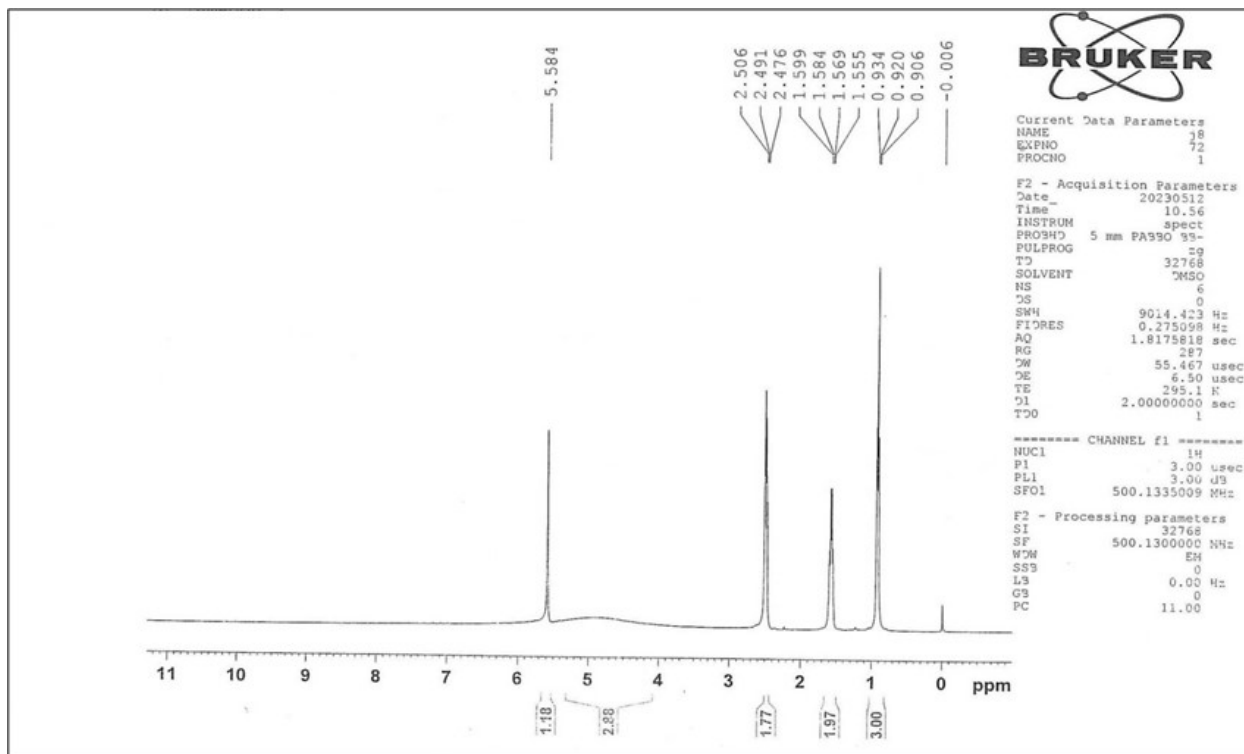

$^1\text{H}$  NMR (500 MHz,  $\text{DMSO-}d_6$ ) spectrum of (**1e**)

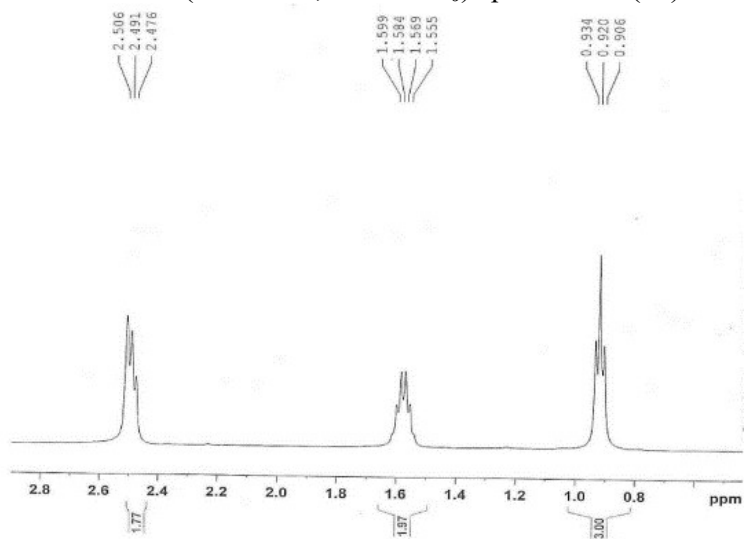

Expand of  $^1\text{H}$  NMR (500 MHz,  $\text{DMSO-}d_6$ ) spectrum of (**1e**)

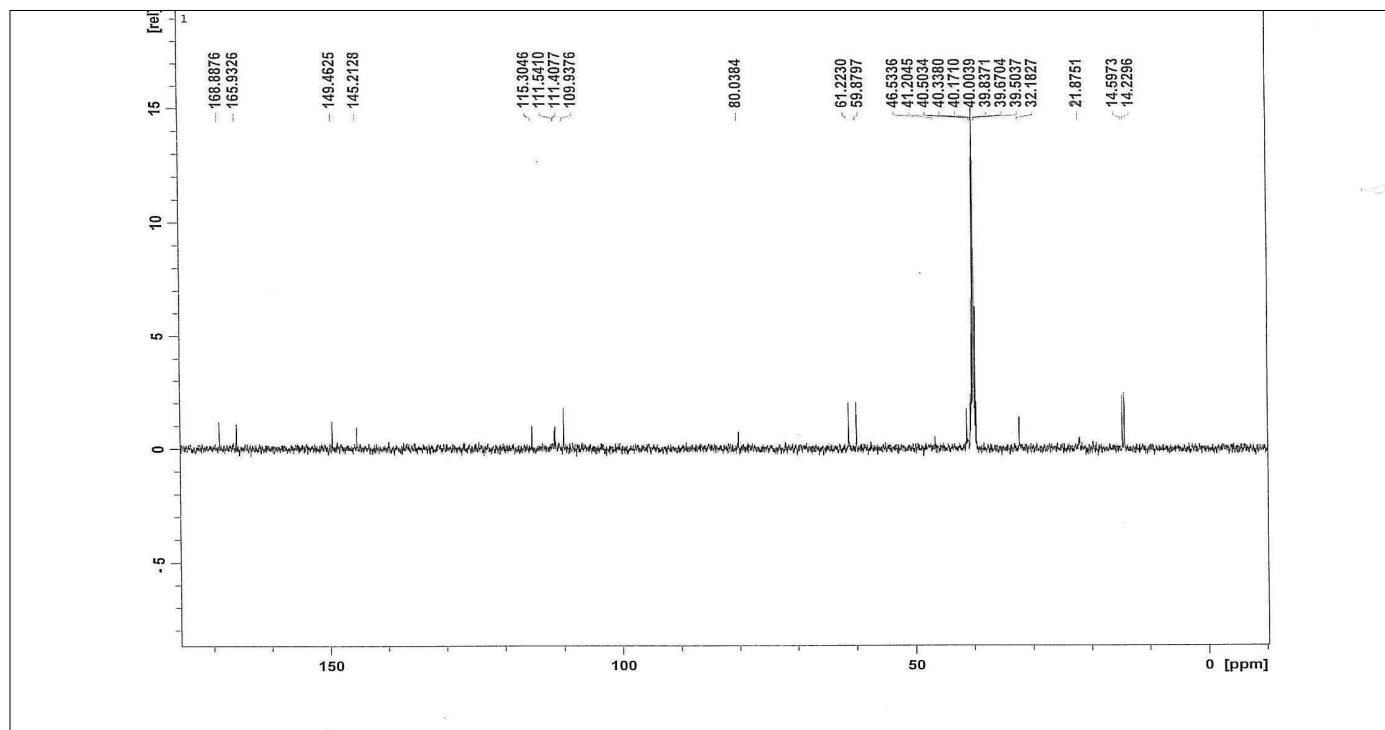

<sup>13</sup>C NMR (125 MHz, DMSO-*d*<sub>6</sub>) spectrum of **(1e)**

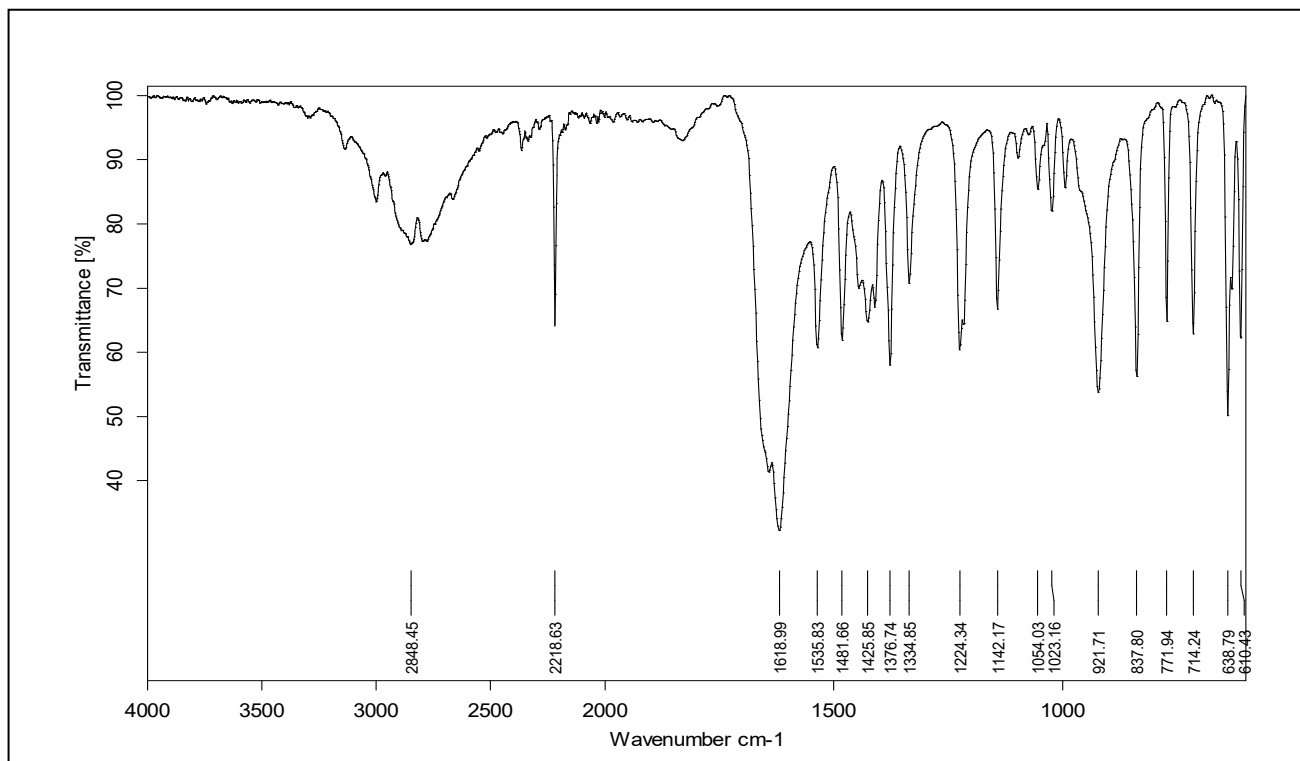

FT-IR (KBr) spectrum of (**1f**)

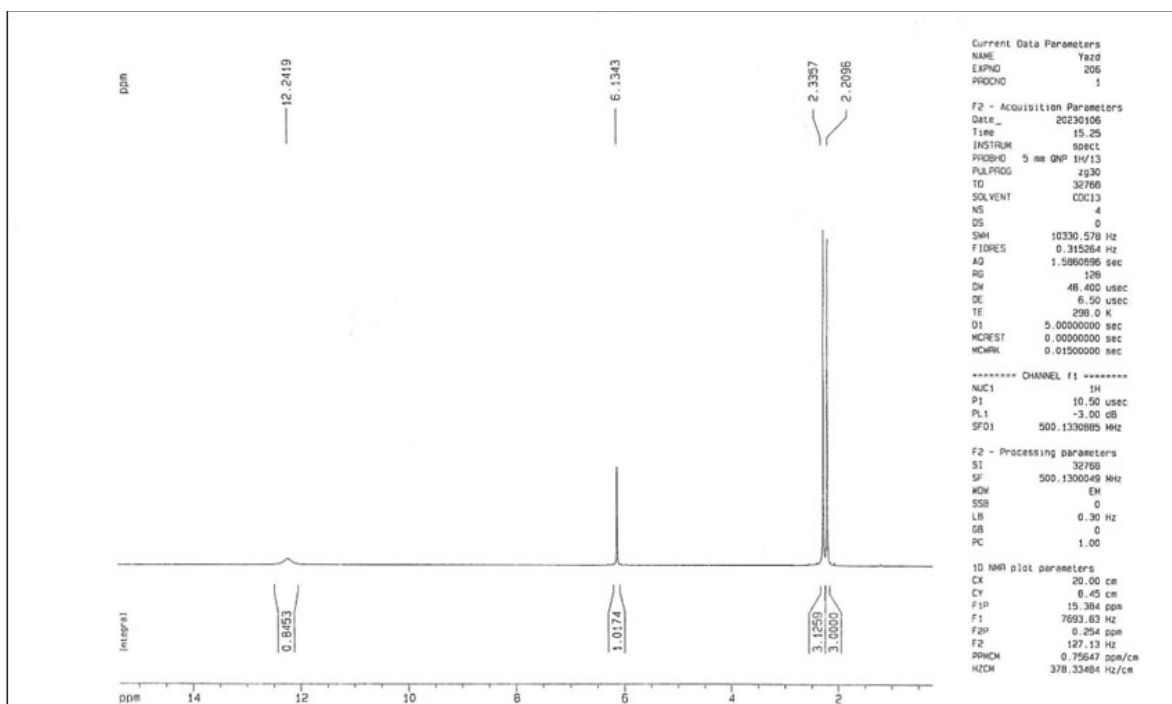

$^1\text{H}$  NMR (500 MHz,  $\text{DMSO-}d_6$ ) spectrum of (**1f**)

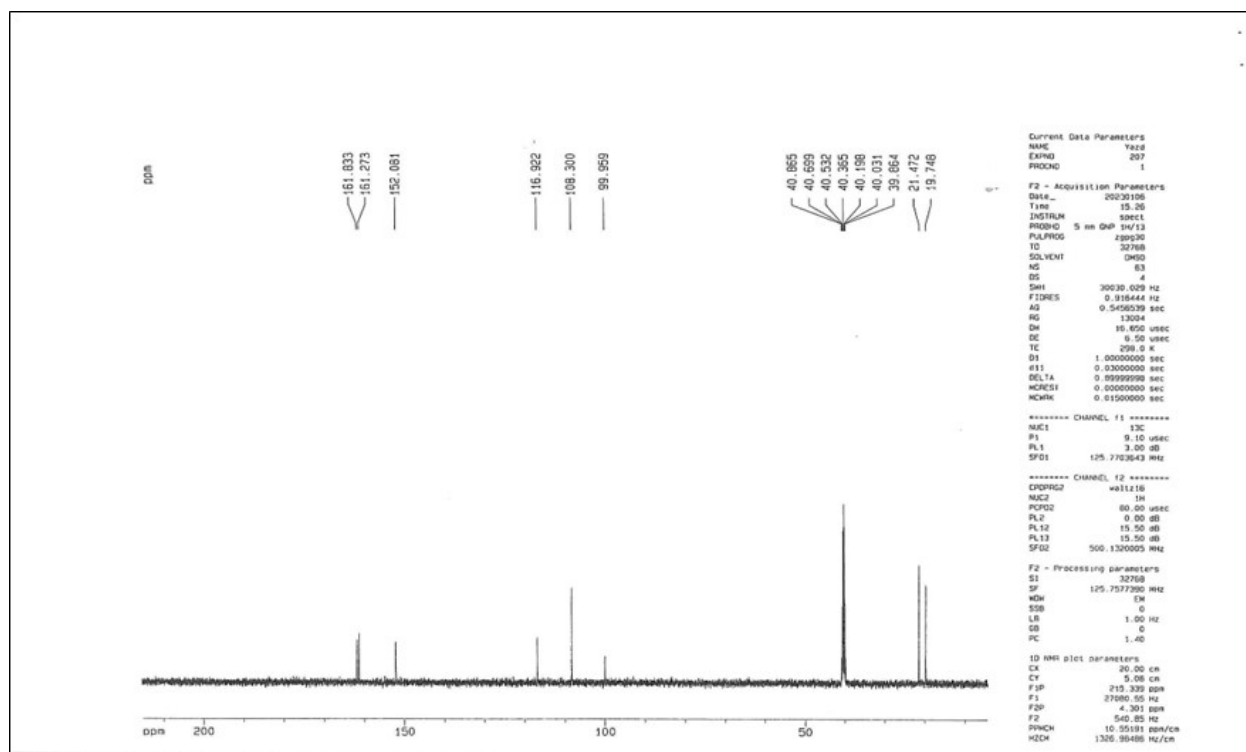

$^{13}\text{C}$  NMR (125 MHz,  $\text{DMSO-}d_6$ ) spectrum of (**1f**)

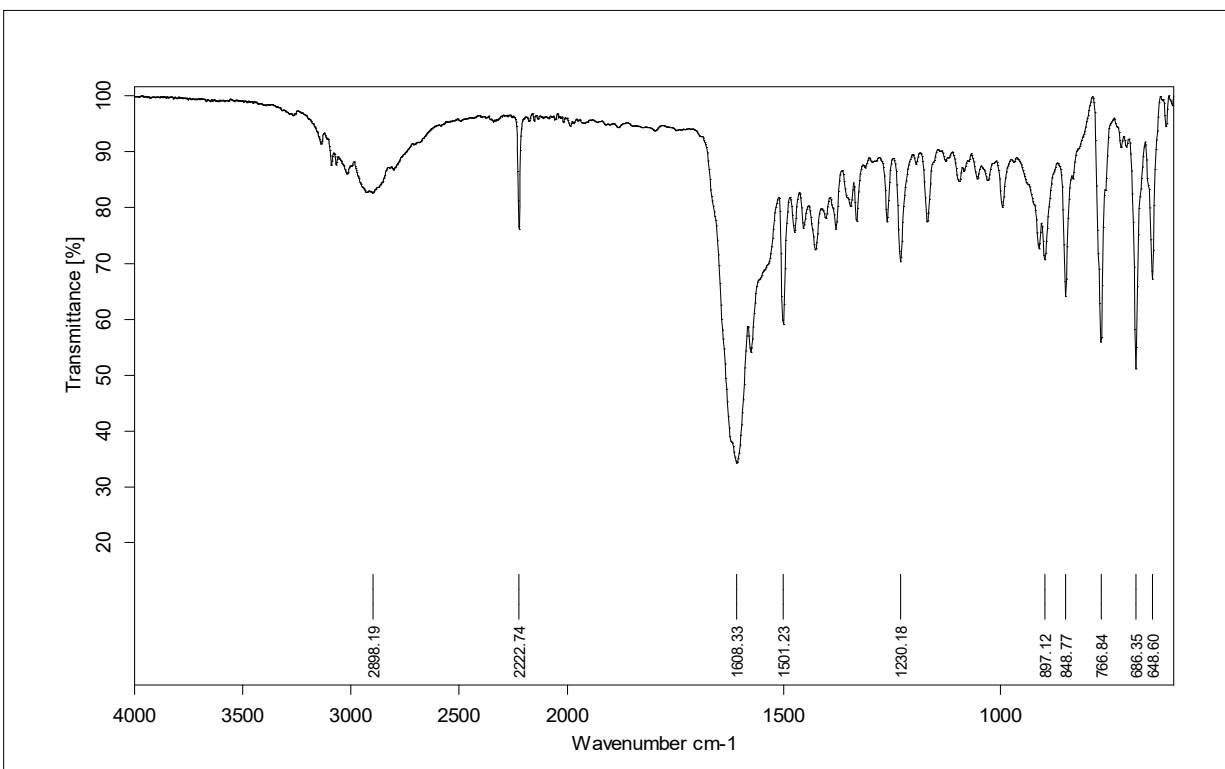

FT-IR (KBr) spectrum of **(1g)**

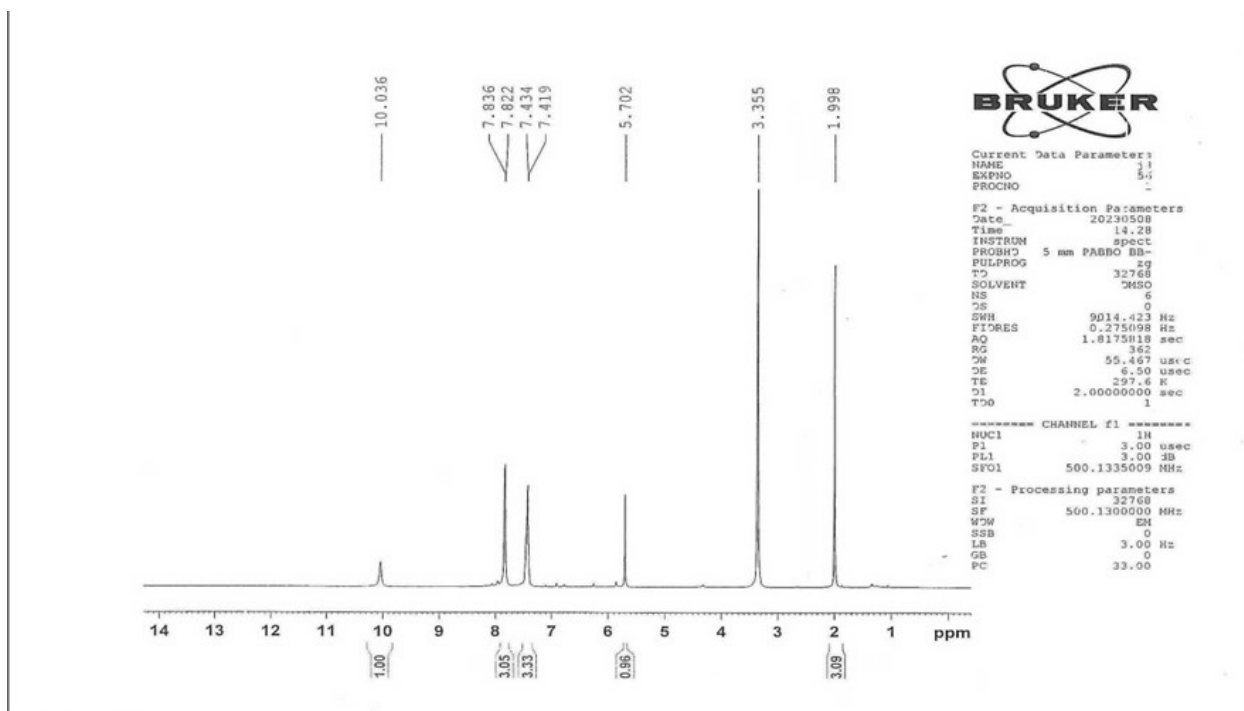

$^1\text{H}$  NMR (500 MHz,  $\text{DMSO-}d_6$ ) spectrum of (**1g**)

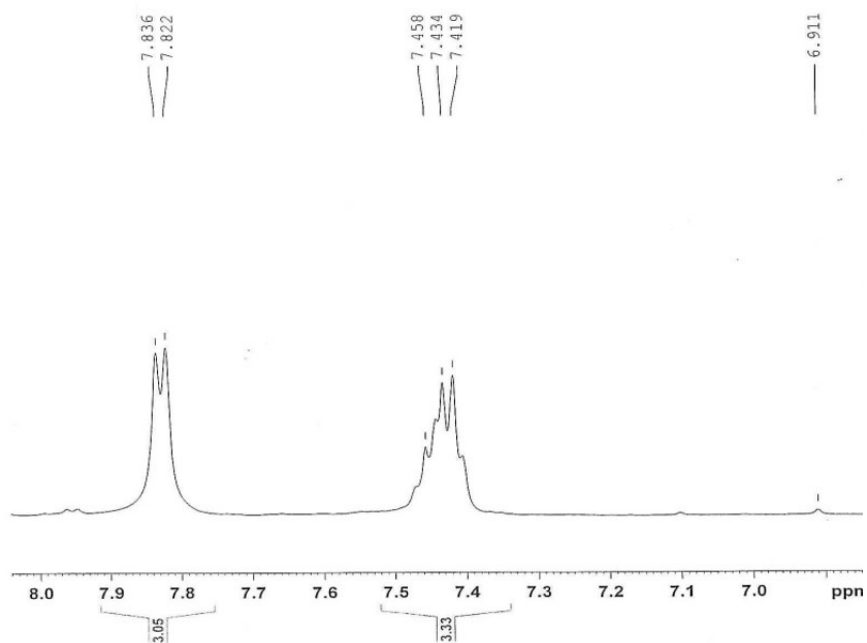

Expand of  $^1\text{H}$  NMR (500 MHz,  $\text{DMSO-}d_6$ ) spectrum of (**1g**)



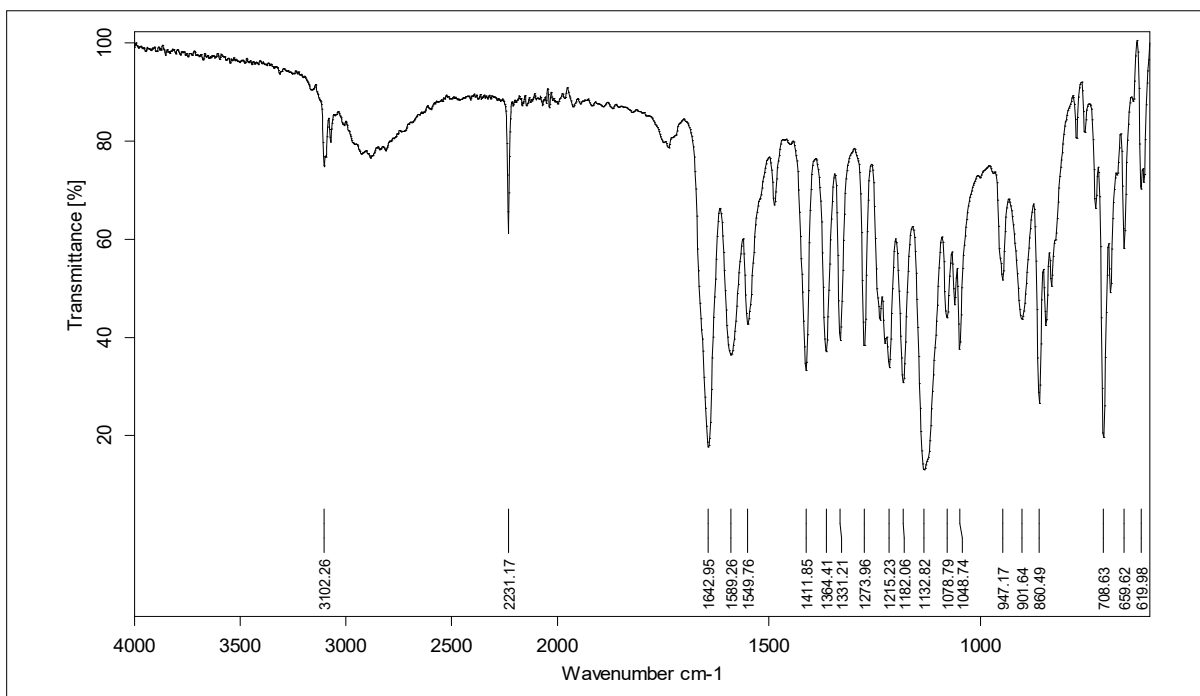

FT-IR (KBr) spectrum of (**1h**)

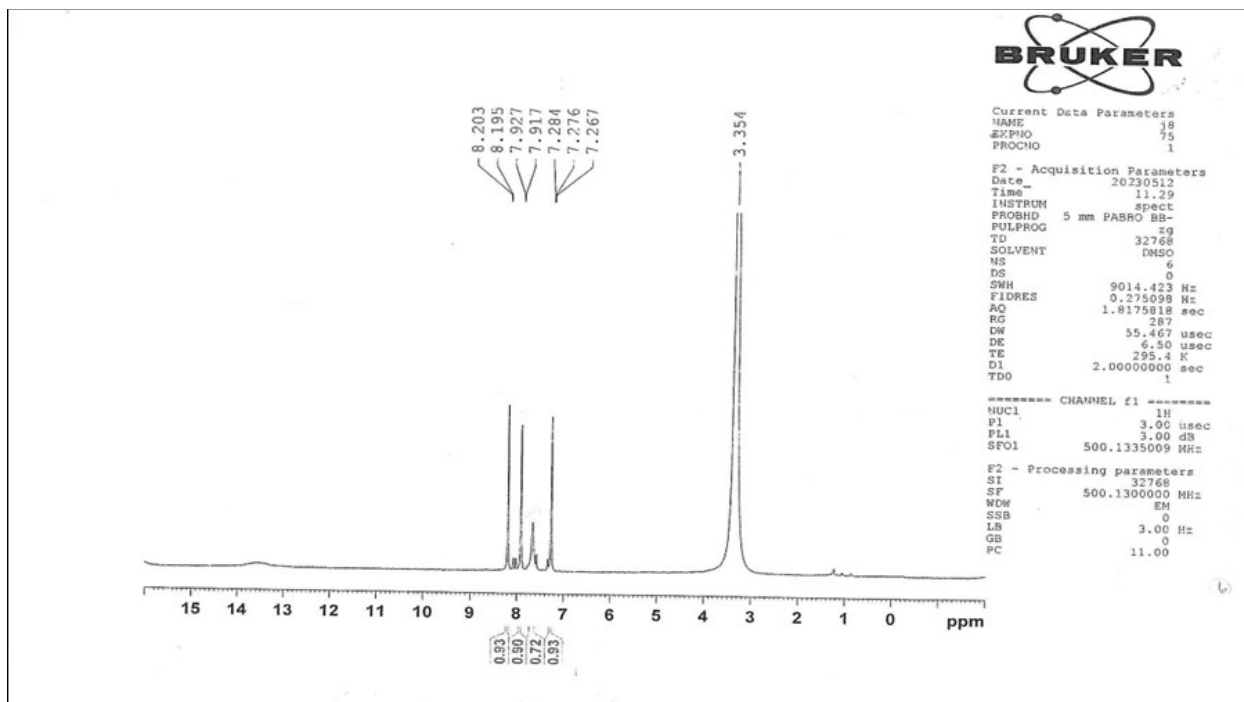

<sup>1</sup>H NMR (500 MHz, DMSO-*d*<sub>6</sub>) spectrum of (**1h**)

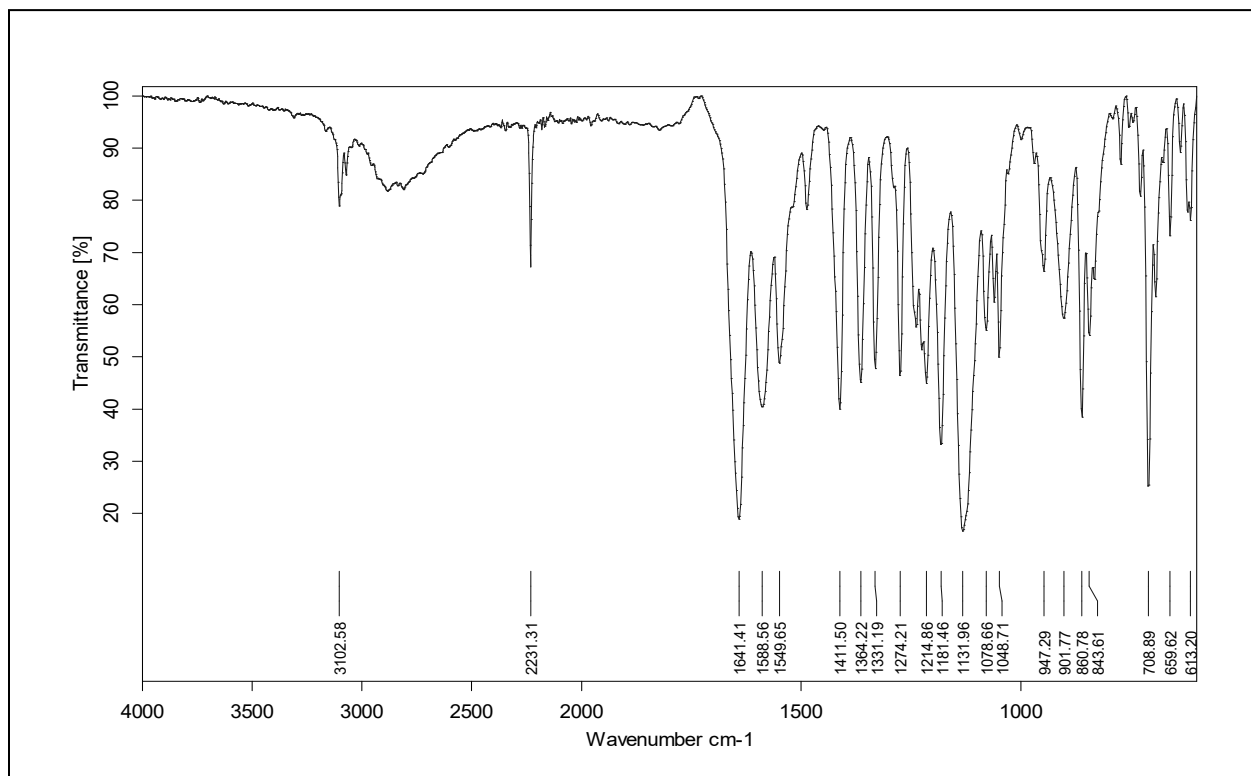

FT-IR (KBr) spectrum of (1i)

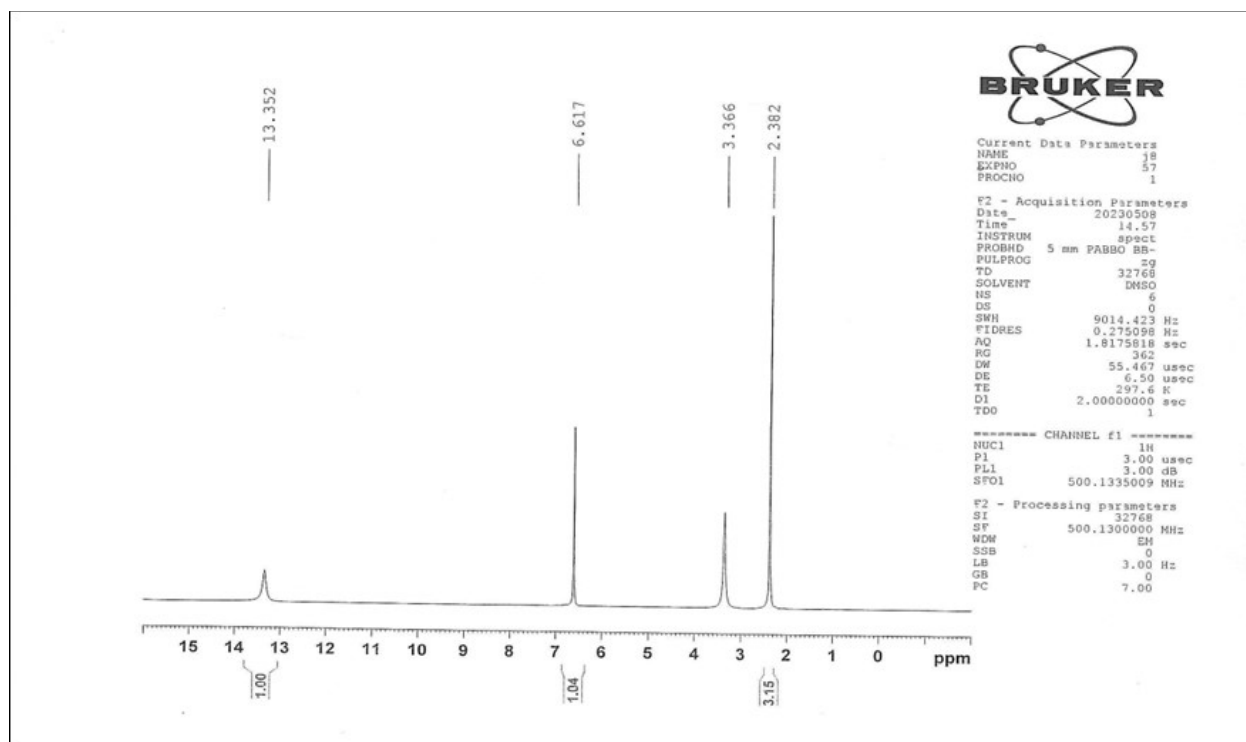

$^1\text{H}$  NMR (500 MHz,  $\text{DMSO-}d_6$ ) spectrum of (**1i**)

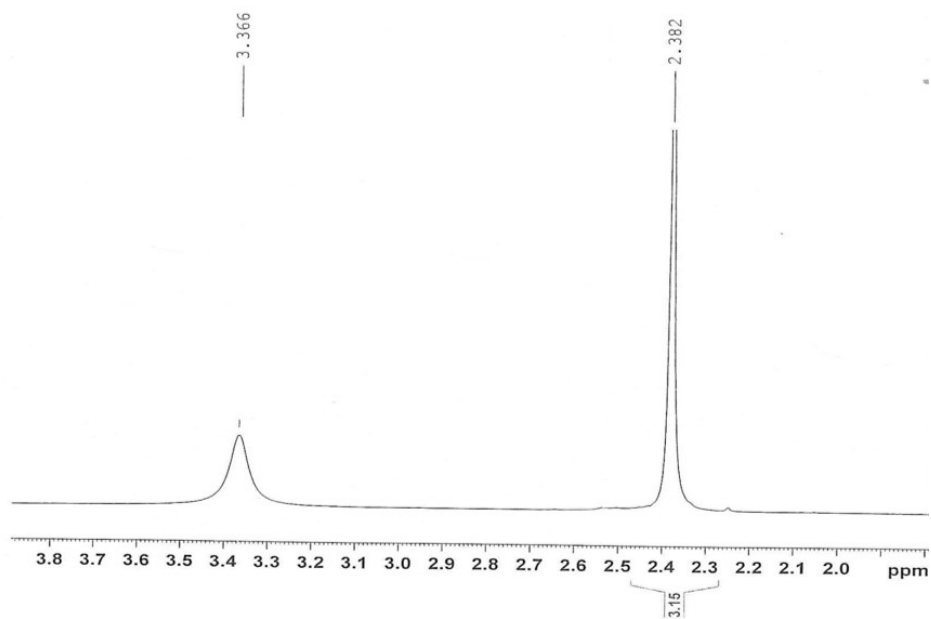

Expand of  $^1\text{H}$  NMR (500 MHz,  $\text{DMSO-}d_6$ ) spectrum of (**1i**)

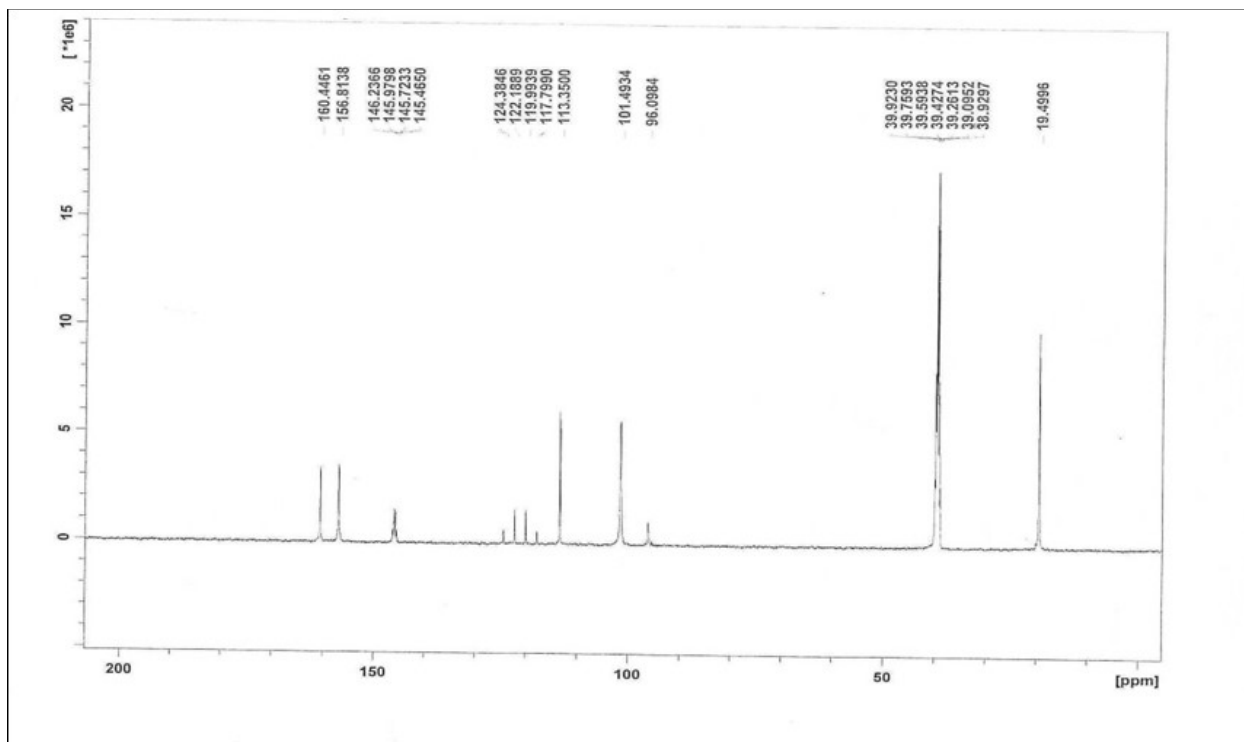

$^{13}\text{C}$  NMR (125 MHz,  $\text{DMSO-}d_6$ ) spectrum of (**Ii**)

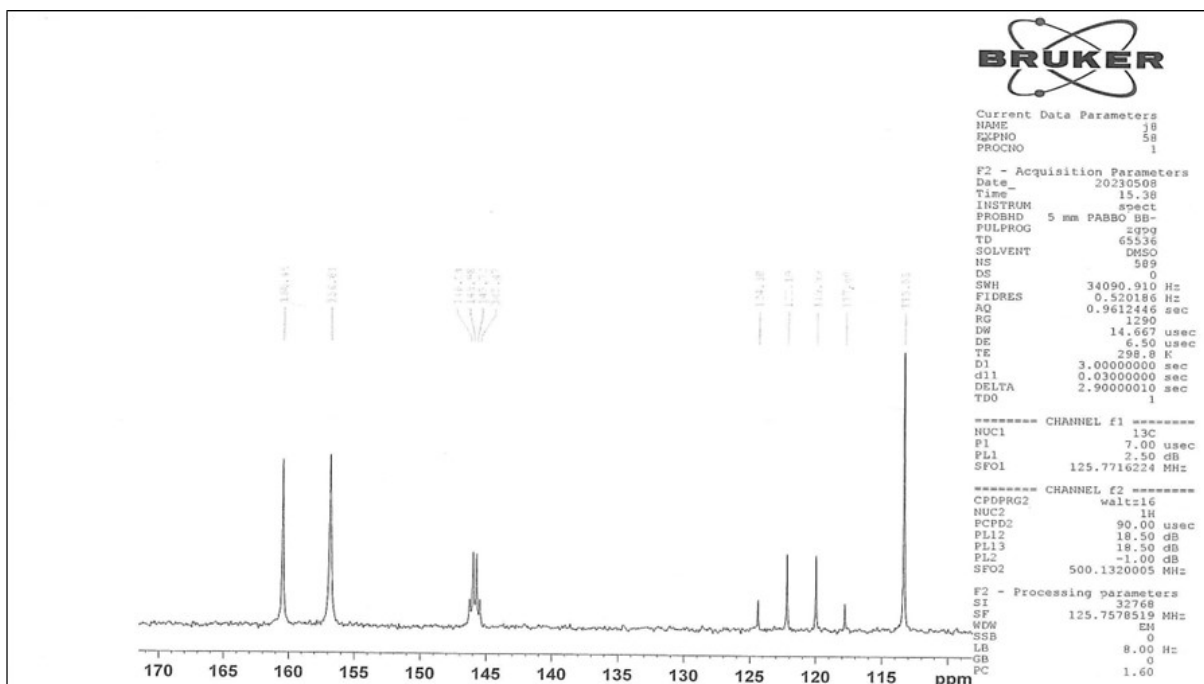

Expand of  $^{13}\text{C}$  NMR (125 MHz,  $\text{DMSO-}d_6$ ) spectrum of (**Ii**)

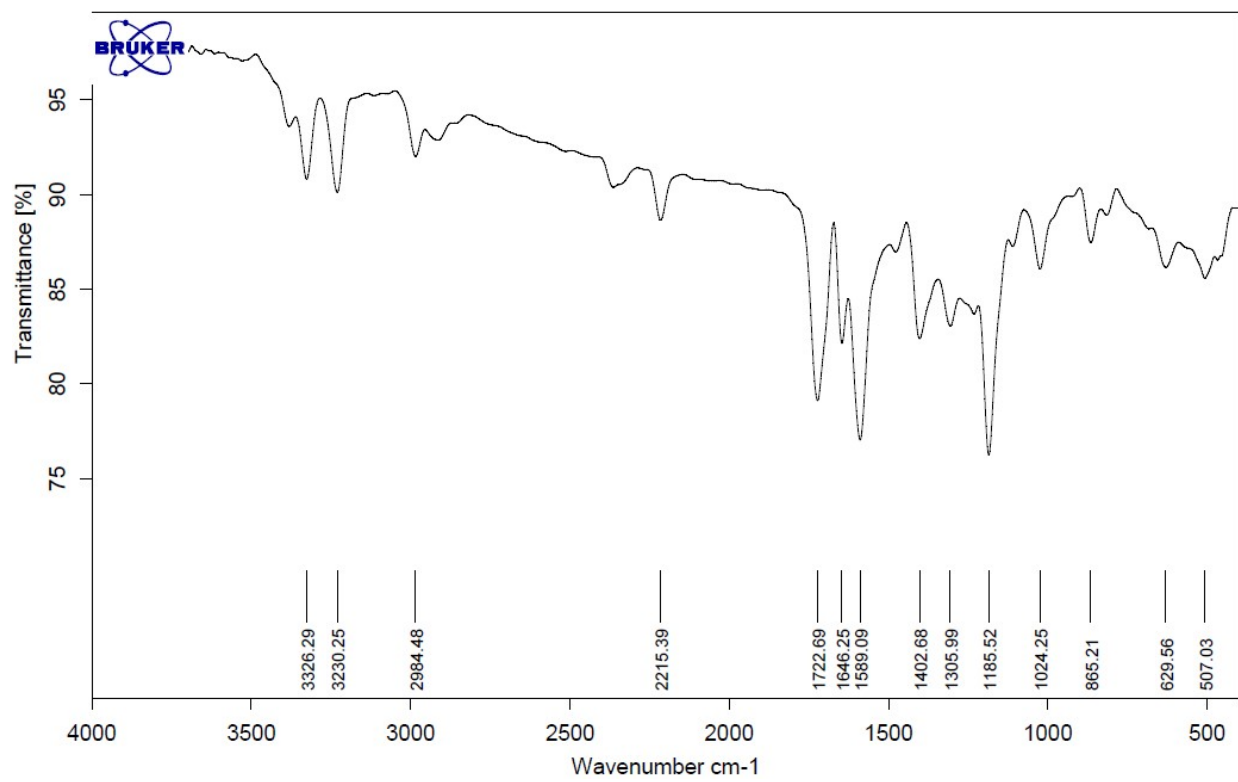

FT-IR (KBr) spectrum of (2a)

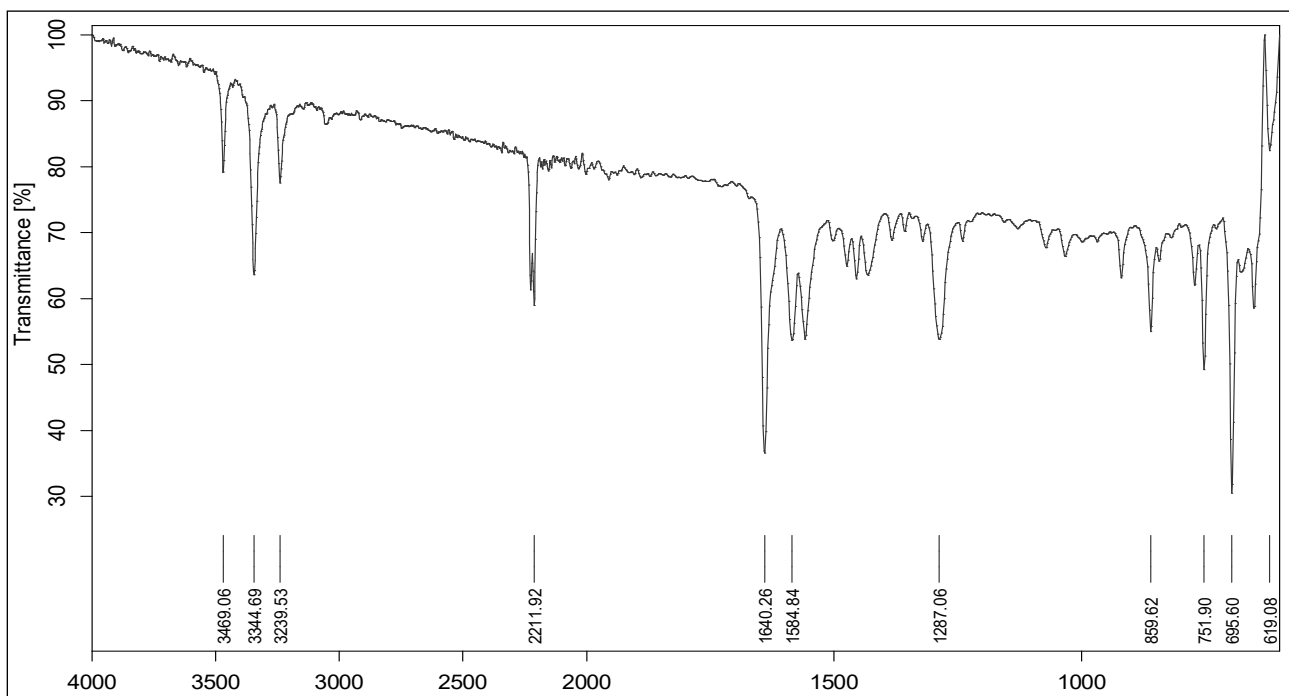

FT-IR (KBr) spectrum of **(2b)**

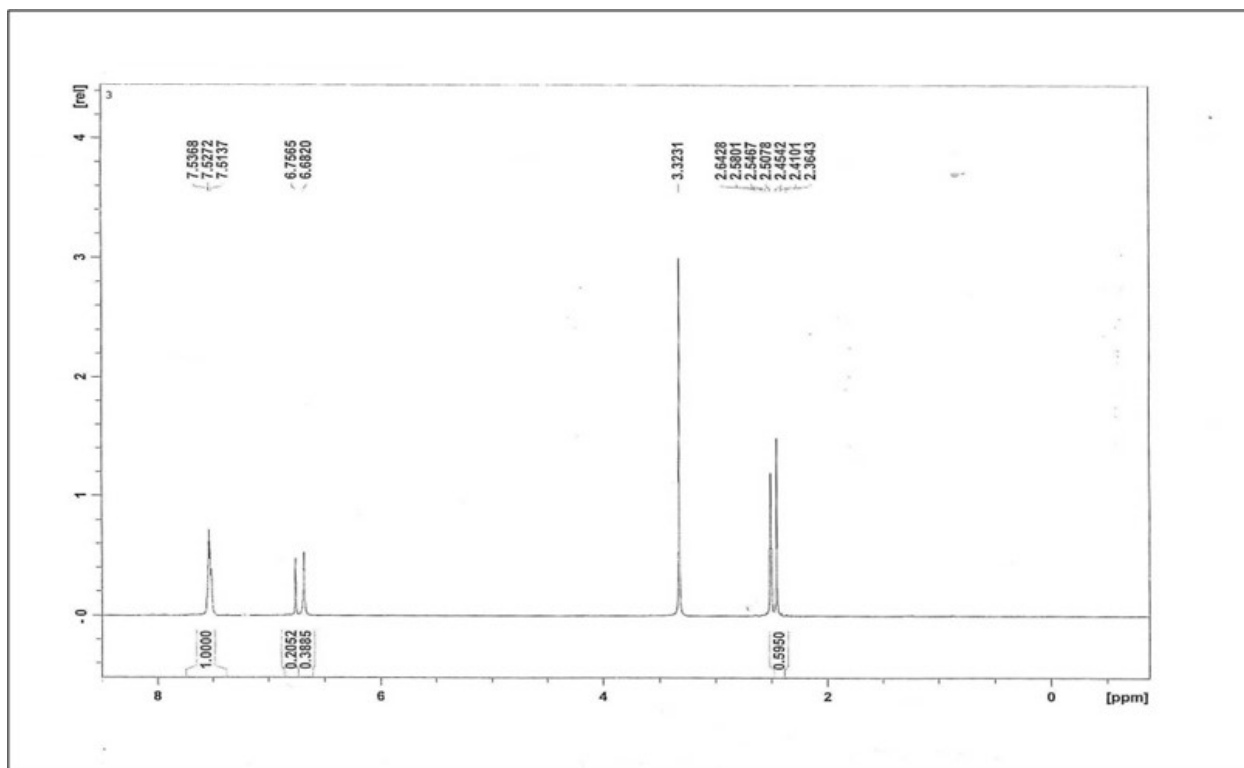

$^1\text{H}$  NMR (500 MHz,  $\text{DMSO}-d_6$ ) spectrum of (**2b**)

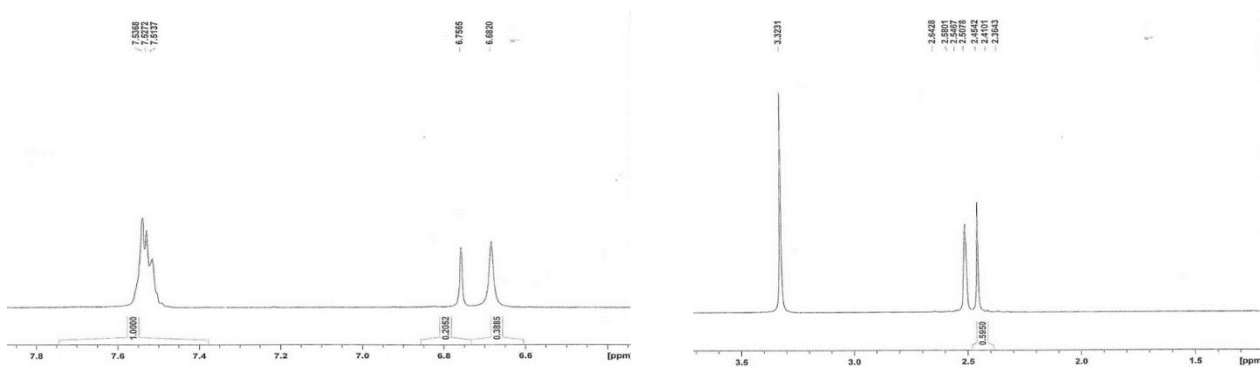

Expand of  $^1\text{H}$  NMR (500 MHz,  $\text{DMSO}-d_6$ ) spectrum of (**2b**)



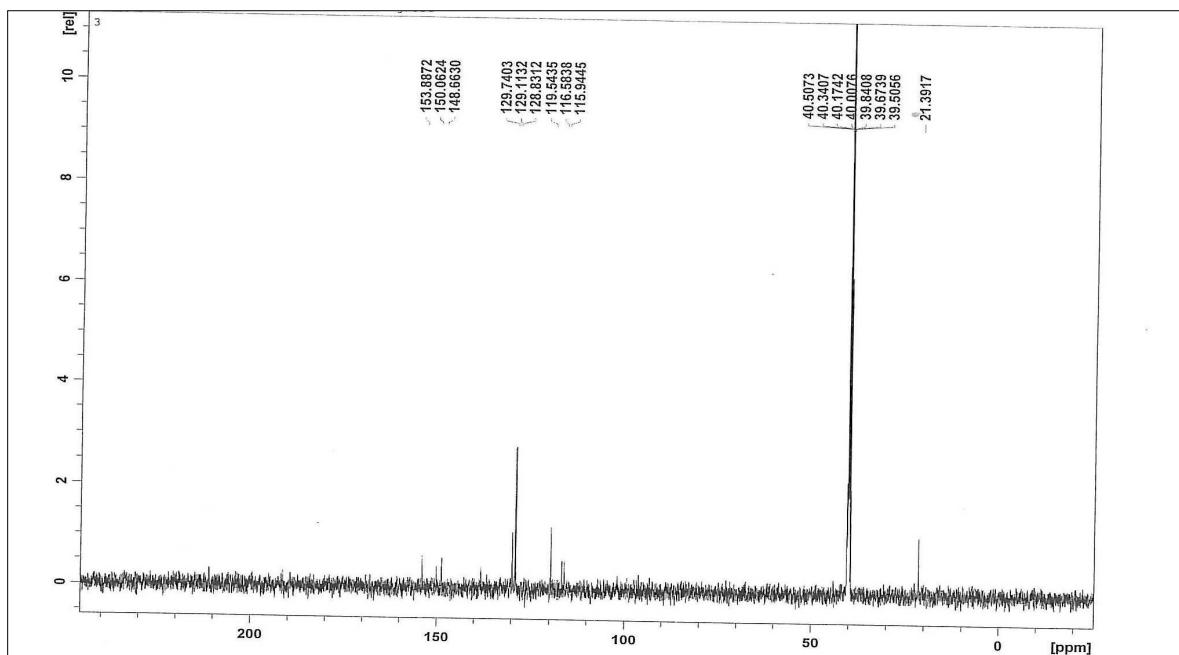

<sup>13</sup>C NMR (125 MHz, DMSO-*d*<sub>6</sub>) spectrum of **(2b)**

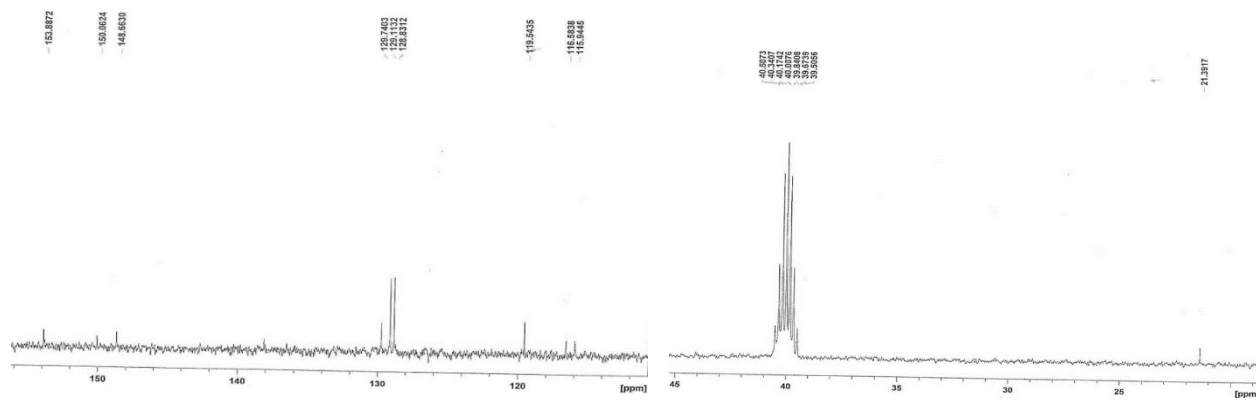

Expand of <sup>13</sup>C NMR (125 MHz, DMSO-*d*<sub>6</sub>) spectrum of **(2b)**
